# Supplementary material
Source: ML conference proceedings conference paper supplement (https://openreview.net/forum?id=8L6pHd9aS6w)
Supplement: supplementary_material [file attachment]

# XSkill: Cross Embodiment Skill Discovery

Anonymous Author(s)

Affiliation

Address

email

## 1 Ablation Study

We performed an ablation study to assess the impact of the number of skill prototypes ( $K$ ) in our XSkill framework within the simulated Franka Kitchen environment. We tested  $K$  values of 32, 128, 256, and 512, with the results for  $K = 128$  reported in our main paper. The outcome of this ablation study can be found in Tab. 1.

We observed that increasing the number of skill prototypes ( $K$ ) to 256 or 512 did not degrade the performance of XSkill. However, reducing  $K$  did impact performance adversely. We hypothesize that a smaller  $K$  value (i.e., 32) may limit the representation capacity of the skill space, as all skill representations  $z$  are enforced to map around one of the skill prototypes. This could potentially force distinct skills to map around the same prototype, resulting in diminished manipulation performance. On the contrary, a larger  $K$  value doesn't hinder performance; in fact, increasing  $K$  might augment the granularity of the representation space, allowing unique skills to have distinct representations within this space.

These results suggest that the performance of our framework is not significantly affected by the choice of  $K$ . We believe this is due to the fact that the projected skill prototypes are not directly inputted into the imitation learning policy  $\pi(\mathbf{a}_t|s_t, z_t)$  and SAT  $\phi(z_t|\tilde{z}, o_t)$ . Instead, we utilize the continuous skill representation  $z$  prior to projection. This choice allows for greater flexibility and granularity in representing skills, making the specific choice of  $K$  less crucial. Therefore, while fine-tuning  $K$  may still be necessary for optimal results in certain environments (e.g., a simulated Franka Kitchen with seven sub-tasks requiring large  $K$  as opposed to a real-world kitchen with four sub-tasks where a  $K$  value of 32 may suffice), our framework demonstrates robustness against variations in the number of skill prototypes.

Table 1: Ablation Study Result (%)

| Execution speed  | Same       | Cross Embodiment |              |
|------------------|------------|------------------|--------------|
|                  | $\times 1$ | $\times 1$       | $\times 1.5$ |
| XSkill $K = 32$  | 91.6       | 67.5             | 48.7         |
| XSkill $K = 128$ | 95.8       | 89.4             | 70.2         |
| XSkill $K = 256$ | 98.3       | 86.6             | 76.7         |
| XSkill $K = 512$ | 97.5       | 90.7             | 71.8         |

## 2 Environment&Data Collections

We begin with a formal description of the three distinct data sources. **1). Human demonstration dataset:** Herein,  $\tau_i^h = \{o_0, \dots, o_{T_i}\}$ , where  $o_t$  denotes the RGB visual observation at the time  $t$ . Within each trajectory, a subset of skills  $\{z_j\}_{j=0}^{J_i}$  is sampled from a skill distribution  $p(\mathcal{Z})$  containing  $N$  unique skills and a human performs in a random sequence. **2). Robot teleoperation data:** This dataset comprises teleoperated robot trajectories  $\tau_i^r = \{(o_0, s_0^{prop}, a_0), \dots, (o_{T_i}, s_{T_i}^{prop}, a_{T_i})\}$ ,

where  $s_t^{prop}$ ,  $a_t$  correspond to robot proprioception data and end-effector action at time  $t$  respectively. We utilize  $s_t$  as the symbol for  $o_t$ ,  $s_t^{prop}$  throughout the main paper. Analogous to the human demonstration dataset, each trajectory incorporates a subset of skills  $z_{j=0}^{J_i}$ , sampled from the skill distribution  $p(\mathcal{Z})$ , which the robot executes in a random sequence. **3). Human prompt video:** This single trajectory of human video  $\tau_{prompt}^h = \{o_0, \dots, o_{T_{prompt}}\}$  demonstrate **unseen** composition of skills  $\{z_j\}_{j=0}^{J_{prompt}}$  taken from the skill distribution  $p(\mathcal{Z})$ . We represent the RGB video trajectories that include only the RGB visual observation  $\{o_0, \dots, o_{T_i}\}$  for both human and robot in the main paper as  $V_i$  for the sake of simplicity.

## 2.1 Simulation

In order to produce a cross-embodiment dataset, we modified the initial Franka Kitchen setup, introducing a sphere agent distinctly visual from the original Franka robot. The sphere agent demonstration dataset was generated by substituting the Franka robot arm with the sphere agent and re-rendering all 600 Franka demonstrations. The images for both Franka robot and sphere agent demonstration are in a resolution of 384x384. Each trajectory in this dataset features the robot completing four sub-tasks in a randomized sequence. The demonstration from both embodiments was divided into a training set and a prompt set, with the latter containing trajectories involving unseen combinations of sub-tasks. This requires the robot to complete tasks namely, opening the microwave, moving the kettle, switching the light, and sliding the cabinet in order.

For skill discovery, we downsampled the demonstration videos to a resolution of 112x112 and randomly applied color jitter, random cropping, Gaussian blur, and grayscale to the input video clips. For diffusion policy training, the environment observation incorporates a 112 x 112 RGB image and a 9-dimensional joint position (include gripper). We used a stack of two consecutive steps of the observation as input for the policy.

## 2.2 Realworld

We conducted data collection for our cross-embodiment dataset in a real-world kitchen environment using a UR5 robot station. The UR5 robot is equipped with a WSG50 gripper and a 3D printed soft finger. It operates by accepting end-effector space position commands at a rate of 125Hz. In the robot station, we have installed two Realsense D415 cameras that capture 720p RGB videos at 30 frames per second. One camera is mounted on the wrist, while the other provides a side view.

Our dataset consists of demonstrations involving both human and robot teleoperation for four specific sub-tasks: opening the oven, grasping cloth, closing the drawer, and turning on the light. To introduce variability, the initial locations of the oven and the pose of the cloth are different for each trajectory. Each demonstration trajectory involves the completion of three sub-tasks in a random order.

For training, we created seven distinct tasks for each embodiment and collected 25 trajectories for each task. The robot teleoperation demonstrations were recorded using a 3Dconnexion SpaceMouse at a rate of 10Hz. For the inference task, we created two unseen tasks with three sub-tasks each, and four unseen tasks with four sub-tasks each. For tasks with three sub-tasks, we recorded both human and robot demonstrations as prompt videos, while for tasks with four sub-tasks, we recorded human demonstrations only. The details of task collections are illustrated in Tab. 2

During skill discovery, we exclusively utilized videos recorded from the side camera and downsampled them to 160x120 at 10fps. Similar to before, we applied random transformations such as random crop, Gaussian blur, and grayscale to the input video clips. For diffusion policy training, we used visual inputs from both cameras, downsampled to 320x240. The input to the diffusion policy included a 6-dimensional end effector pose, a 1-dimensional gripper width, and two visual inputs from both cameras. We only considered one step of observation as the policy input. Position control was selected as the diffusion-policy action space, encompassing the 6-dimensional end effector pose

Table 2: **Training & Inference Task**

|                               | Tasks                    | Human(seconds) | Robot(seconds) |
|-------------------------------|--------------------------|----------------|----------------|
| Overlapping Training Task     | Draw, Light, Oven        | 12.92 + 1.19   | 29.12 + 2.03   |
|                               | Light, Cloth, Oven       | 15.23 + 0.92   | 32.76 + 2.42   |
|                               | Draw, Light, Cloth       | 15.73 + 1.22   | 26.83 + 2.28   |
|                               | Draw, Cloth, Light       | 17.21+1.05     | 31.71 + 3.74   |
| Human exclusive Training Task | Oven, Draw, Cloth        | 11.62+1.58     | /              |
|                               | Cloth, Oven, Light       | 12.69+0.86     | /              |
|                               | Cloth, Light, Oven       | 13.37+0.67     | /              |
| Robot exclusive Training Task | Light, Oven, Draw        | /              | 32.41+3.04     |
|                               | Oven, Light, Cloth       | /              | 26.75+2.56     |
|                               | Light, Draw, Cloth       | /              | 27.10+1.95     |
| Inference Task                | Oven, Draw, Cloth        | 14.4           | 45.7           |
|                               | Draw, Cloth, Oven        | 12.6           | 41.4           |
|                               | Oven, light, Cloth, Draw | 20.5           | /              |
|                               | Draw, Cloth, Light, Oven | 20.9           | /              |
|                               | Draw, Oven, Cloth, Light | 21.0           | /              |
|                               | Draw, Light, Cloth, Oven | 19.2           | /              |

Table 3: **XSkill Inference Task Per Task Results (%)**

| Inference Task           | Cross Embodiment |
|--------------------------|------------------|
| Oven, Draw, Cloth        | 80.0             |
| Draw, Cloth, Oven        | 73.3             |
| Oven, Light, Cloth, Draw | 75.0             |
| Draw, Cloth, Light, Oven | 90.0             |
| Draw, Oven, Cloth, Light | 25.0             |
| Draw, Light, Cloth, Oven | 50.0             |

and 1-dimensional gripper width. During training, we applied random crop with a shape of 260x288, while during inference, we utilized a center crop with the same shape.

### 3 Additional Experiment Results

We show the performance of XSkill for each task with cross-embodiment prompt during the inference in Tab. 3. As we discuss in the main paper, the major limitation for generalization is the diversity in the robot teleoperation data. From Tab. 3, we can observe Task *Draw, Oven, Cloth, Light* only achieve 25% success rate as there is no robot trajectories contains the transition dynamic from Draw to Oven. Similar for Task *Oven, Light, Cloth, Draw*, as there is no transition dynamic between Cloth to Draw in recorded robot data, XSkill fail to complete the last sub-task.

## 4 Implementation Details

### 4.1 Temporal Skill Encoder & Prototypes Layer

The temporal skill encoder  $f_{\text{temporal}}$  consists of a vision backbone and a transformer encoder. To efficiently process a large batch of images, we employ a straightforward 3-layer CNN network following a MLP layer as our vision backbone, which can be trained a single NVIDIA 3090. Each images in the input video clip is passed into the vision backbone and the resulting features is flatten into a 512-dimensional feature vectors. The transformer encoder, on the other hand, comprises 8 stacked layers of transformer encoder layers, with each layer employing 4 heads. The dimension of the feedforward network is set to 512. The prototype layer  $f_{\text{prototype}}$  is implemented as a single linear layer without bias. And we normalize its weights with every training iteration. We freeze its weight for first 3 training iteration to stabilize the training process. For TCN loss, in practice, we replace the skill prototype probability with it unnormalized (before applying Softmax function)

Table 4: **Simulated Kitchen Skill Discovery Hyperparameter**

| Hyperparameter                      | Value |
|-------------------------------------|-------|
| Video Clip length $l$               | 8     |
| Sampling Frames $T$                 | 100   |
| Sinkhorn iterations                 | 3     |
| Sinkhorn epsilon                    | 0.03  |
| Prototype loss coef                 | 0.5   |
| Prototype loss temperature          | 0.1   |
| TCN loss coef                       | 1     |
| TCN positive window $w_p$           | 4     |
| TCN negative window $w_n$           | 12    |
| TCN negative samples                | 16    |
| TCN temperature $\tau_{\text{tcn}}$ | 0.1   |
| Batch Size                          | 16    |
| Training iteration                  | 100   |
| Learning rate                       | 1e-4  |
| Optimizer                           | ADAM  |

Table 5: **Realworld Kitchen Skill Discovery Hyperparameter**

| Hyperparameter                      | Value |
|-------------------------------------|-------|
| Video Clip length $l$               | 8     |
| Sampling Frames $T$                 | 100   |
| Sinkhorn iterations                 | 3     |
| Sinkhorn epsilon                    | 0.03  |
| Prototype loss coef                 | 0.5   |
| Prototype Softmax temperature       | 0.1   |
| TCN loss coef                       | 1     |
| TCN positive window $w_p$           | 6     |
| TCN negative window $w_n$           | 16    |
| TCN negative samples                | 16    |
| TCN temperature $\tau_{\text{tcn}}$ | 0.1   |
| Batch Size                          | 20    |
| Training iteration                  | 500   |
| Learning rate                       | 1e-4  |
| Optimizer                           | ADAM  |

97 version  $z_t^T C$  as we notice that the Softmax saturates the gradient, leading to unstable training. The  
 98 additional hyper parameters is summarized in Tab. 4 and 5 for simulated and realworld kitchen  
 99 environment.

## 100 4.2 Skill Alignment Transformer

101 The Skill Alignment Transformer (SAT) comprises a state encoder, denoted as  $f_{\text{state-encoder}}$ , and a  
 102 transformer encoder. The state encoder is implemented as standard Resnet18. The transformer  
 103 encoder consists of 16 stacked layers of transformer encoder layers, each employing 4 heads. and  
 104 the feedforward network has a dimension of 512. As depicted in Section 3.3 of the paper, a set  
 105 of skill representations  $\{z_t\}_{t=0}^{T^i}$  is extracted from the sample trajectory  $\tau_i$  and passed into SAT as  
 106 skill tokens. For practical purposes, XSkill adopts a uniform sampling approach, selecting  $N_{\text{SAT}}$   
 107 prototypes from the skill list. This approach is motivated by two primary reasons. First, skills  
 108 are typically executed over extended periods, and we only require information about the start and  
 109 end times, as well as the time allocated to each skill. Uniform sampling preserves this necessary  
 110 information while reducing redundant prototypes in the list. Second, human demonstrations may  
 111 occur at a significantly faster pace than the robot’s execution, leading to variations in the length of

112 the skill list. This discrepancy can hinder the learning algorithm’s performance during inference.  
 113 By uniformly sampling a fixed number of frames from the set, the learning algorithm operates under  
 114 consistent conditions in both learning and inference stages.  $N_{SAT}$  is set to approximately half of the  
 115 average length of frames in robot demonstrations. During inference, if the length of the extracted  
 116 skill list is less than  $N_{SAT}$ , XSkill uniformly up-samples the skill list. We include a representation  
 117 token after the skill token and the state token to summarize the prediction information. The latent  
 118 representation of the representation token is then passed into a multi-layer perceptron (MLP) to  
 119 predict the desired skill  $z$ . We set  $N_{SAT} = 100$  in the simulated kitchen environment and  $N_{SAT} = 200$   
 120 as the realworld robot trajectories is significantly longer than those in simulation.

### 121 **4.3 Diffusion Policy**

122 We use the original code base from Chi et al. [1] and adapt same the configuration for both the  
 123 simulated and realworld environment. We refer the reader to the paper for details.

## 124 **References**

- 125 [1] C. Chi, S. Feng, Y. Du, Z. Xu, E. Cousineau, B. Burchfiel, and S. Song. Diffusion policy:  
126 Visuomotor policy learning via action diffusion. *arXiv preprint arXiv:2303.04137*, 2023.
